# Supplementary material for: First report of the genus Pelecystola Meyrick (Lepidoptera, Tineidae) in China, with description of a new species
Source: Zookeys. 2021 Jun 22;1046:189–206. doi: 10.3897/zookeys.1046.68329 (PMC8241806; doi:10.3897/zookeys.1046.68329)
Supplement: Supplementary material 1 — Table S1. Specimen data and GenBank accessions [file zookeys-1046-189-s001.xls]

## Sheet: Sheet1
Title: First report of the genus Pelecystola Meyrick (Lepidoptera, Tineidae) in China, with description of a new species Authors: Lin-Lin Yang, Hou-Hun Li
Table S1. Specimen data and genbank accessions
Species name	Collection site	Lat Lon	Altitude	Collection date	Collectors	Slide number	Sex	Type status:	COI	CAD	Wingless
Pelecystola peculiaris sp. nov.	China, Guizhou, Qiandongnan Miao and Dong autonomous prefecture, Leishan County, Mt. Leigong	26°22΄N 108°11΄E	1535 m	25.vii.2019	Mengran Xing	DNAYLL18063	female	Paratype	MT749675/PELE001-20	MW767872	MW767877
Pelecystola peculiaris sp. nov.	China, Shaanxi Province, Langao County, Qiancenghe	32°07΄N 108°48΄E	1338 m	10.viii.2016	Weixing Feng and Wentao Shi	DNAYLL18051	female	Paratype	MW396736/PELE003-20
Pelecystola peculiaris sp. nov.	China, Sichuan Province, Mianyang, Pingwu, Wanglang	32°54′N 104°09′E	2569 m	23.vii.2017	Mujie Qi and Xiaofei Yang	DNAYLL18052	male	Holotype	MW396737/PELE004-20
Pelecystola peculiaris sp. nov.	China, Sichuan Province, Yaan, Baoxing, Fengtongzhai	30°30΄N 102°54΄E	1565 m	3.viii.2016	Tao Fei	DNAYLL18064	female	Paratype	MW396738/PELE005-20
Pelecystola strigosa (Moore, 1888)	China, Xizang Autonomous Region, Bomi County, Sangdeng	29°51΄N 95°46΄E	2695 m	21.viii.2017	Mujie Qi & Xiaofei Yang	DNAYLL18054	female		MT749676/PELE002-20	MW767871	MW767876
Pelecystola strigosa (Moore, 1888)	China, Yunnan Province, Xishuangbanna, Yexianggu	22°10'N 100°51'E	762 m	17.vii.2014	Kaijian Teng	DNAYLL18053	male		MW396739/PELE006-20
Pelecystola strigosa (Moore, 1888)	China, Yunnan Province, Dehong, Ruili, Rare Botanical Garden	24°00'N 97°50'E	1166 m	17.viii.2015	Jingxia Zhao	DNAYLL18065	male		MW396740/PELE007-20
Pelecystola strigosa (Moore, 1888)	China, Yunnan Province, Wenshan, Masupo, Xiajinchang	23°10'N 104°48'E	1470 m	27.vii.2016	Kaijian Teng	DNAYLL18066	male		MW396741/PELE008-20
Pelecystola strigosa (Moore, 1888)	China, Yunnan Province, Baihualing, Hanlongzhai	25°24'N 98°45'E	1577 m	5.viii.2015	Kaili Liu and Jingxia Zhao	DNAYLL18068	male		MW396742/PELE009-20
Tinissa indica Robinson, 1976	China, Hainan, Wuzhishan National Nature Reserve, Shuimanxiang	18°54'N 109°41'E	735 m	25.viii.2020	Linlin Yang	DNAYLL18219	male		MW771607/PELE010-21	MW767874	MW767879
Micrerethista denticulata Davis, 1998	China, Hainan, Wuzhishan National Nature Reserve, Shuimanxiang	18°54'N 109°41'E	735 m	25.viii.2020	Linlin Yang	DNAYLL18128	male		MW771606/PELE011-21	MW767873	MW767878
Opogona sp.	China, Guangxi, Nonggang National Nature Reserve, Longting	22°38'N 106°59'E	170 m	18.viii.2020	Linlin Yang	DNAYLL18242	male		MW771608/PELE012-21	MW767875	MW767880
