# Supplementary material for: First report of the genus Pelecystola Meyrick (Lepidoptera, Tineidae) in China, with description of a new species
Source: Zookeys. 2021 Jun 22;1046:189–206. doi: 10.3897/zookeys.1046.68329 (PMC8241806; doi:10.3897/zookeys.1046.68329)
Supplement: Supplementary material 2 — Table S2. Species used in the phylogenetic analysis, with GenBank and BOLD references [file zookeys-1046-189-s002.xls]

## Sheet: table2
Title: First report of the genus Pelecystola Meyrick (Lepidoptera, Tineidae) in China, with description of a new species Authors: Lin-Lin Yang, Hou-Hun Li
Table S2 Species used in the phylogenetic analysis, with Genbank and BOLD references
Species name	Subfamily/Family	References/Slide No.	COI	CAD	Wingless
Pelecystola peculiaris sp.nov.	incertae sedis	DNAYLL18063	MT749675/PELE001-20	MW767872	MW767877
Pelecystola strigosa (Moore, 1888)	incertae sedis	DNAYLL18054	MT749676/PELE002-20	MW767871	MW767876
Tinissa indica Robinson, 1976	Scardiinae	DNAYLL18219	MW771607/PELE010-21	MW767874	MW767879
Micrerethista denticulata Davis, 1998	Harmacloninae	DNAYLL18128	MW771606/PELE011-21	MW767873	MW767878
Opogona sp.	Hieroxestinae	DNAYLL18242	MW771608/PELE012-21	MW767875	MW767880
Gerontha acrosthenia Zagulajev, 1972	Myrmecozelinae	Mutanen et al., 2010	GU828798	GU828272	GU829657
Agnathosia mendicella (Denis & Schiffermüller, 1775)	incertae sedis		GU828825	GU828294	GU829679
Scardia boletella (Fabricius, 1794)	Scardiinae		GU828669	GU828166	GU829554
Nemapogon variatellus (Clemens, 1859)	Nemapogoninae		GU828685	GU828176	GU829565
Nemaxera betulinella (Paykull, 1785)	Nemapogoninae		GU828584	GU828086	GU829484
Tinea pellionella (Linnaeus, 1758)	Tineinae		GU828746	GU828230	GU829609
Edosa fuscoviolacella (Ragonot, 1895)	Perissomasticinae		GU828620	GU828121	GU829515
Hapsifera luridella Zeller, 1847	Hapsiferinae		GU828618	GU828119	GU829513
Opogona sacchari (Bojer, 1856)	Hieroxestinae		GU828756	GU828239	GU829618
Comodica sp.	Erechthiinae			GU828260	GU829645
Euplocamus anthracinalis (Scopoli, 1763)	Euplocaminae		GU828763	GU828245	GU829625
Psychoides verhuella Bruand, 1853	Teichobiinae		GU828760	GU828242	GU829622
Erechthias zebrina (Butler, 1881)	Erechthiinae	Regier et al., 2014	GU696090/LTOLB433-09	JQ784532	JQ786818
Pyloetis mimosae (Stainton, 1859)	Erechthiinae		KF492067/LTOL211-07	JQ784794	JQ787012
Psecadioides aspersus Butler 1881	Euplocaminae		LTOL863-08	JQ784773	JQ787000
Paraptica concinerata Meyrick, 1917	Hapsiferinae		HM377827/LTOLB313-09	JQ784722	JQ786962
Harmaclona sp. nov.	Harmacloninae		KF491780/LTOLB061-08	JQ784560	JQ786841
Dyotopasta yumaella (Kearfott, 1907)	incertae sedis		KF492323/NAMUM360-08	JQ784476	JQ786778
Pelecystola nearctica Davis & Davis, 2009	incertae sedis		KM542012/CNSLO021-13	JQ784751	JQ786984
Xylesthia pruniramiella Clemens, 1859	incertae sedis		GU090242/LGSM590-04	JQ784897	JQ787088
Diachorisia velatella Clemens, 1860	incertae sedis		GU801330/LPOKC448-09	JQ784475	JQ786777
Hybroma servulella Clemens, 1862	incertae sedis		MNAC650-07	JQ784592	JQ786867
Leucomele miriamella Dietz, 1905	incertae sedis		MG365054/BARSM357-17	JQ784625	JQ786894
Oenoe hybromella Chambers, 1874	incertae sedis		KF491948/LTOL954-08	JQ784697	JQ786948
Cephimallota chasanica Zagulajev, 1965	Myrmecozelinae		KF523758/LTOL830-07	JQ784409	JQ786731
Moerarchis inconcisella (Walker, 1863)	Myrmecozelinae		KF522609/LTOL129-06	JQ784662	JQ786921
Myrmecozela ochracella (Tengström, 1848)	Myrmecozelinae		HM377856/LTOLB435-09	JQ784660	JQ786919
Xystrologa sp.	Myrmecozelinae		KF492616/NAMUM033-08	JQ784896	JQ787087
Nemapogon cloacella (Haworth, 1828)	Nemapogoninae		HQ955240/FBLMU582-09	JQ784675	JQ786933
Edosa sp.	Perissomasticinae		KF522560/LTOL981-08	JQ784481	JQ786780
Perissomastix sp.	Perissomasticinae		LTOL226-07	JQ784732	JQ786968
Morophaga bucephala (Snellen, 1884)	Scardiinae		HM890785/LTOLB436-09	JQ784659	JQ786918
Scardiella approximatella (Dietz, 1905)	Scardiinae		HQ583322/USLEP1206-10	JQ784808	JQ787023
Monopis pavlovsky Zagulajev, 1955	Tineinae		KF491876/LTOLB074-08	JQ784657	JQ786916
Praeacodes atomosella (Walker, 1863)	Tineinae		KF492039/LTOLB101-08	JQ784766	JQ786995
Tinea columbariella Wocke, 1877	Tineinae		GU695981/LTOL067-06	GQ283585	GQ283899
Tineola bisselliella (Hummel, 1823)	Tineinae		KX232890/LTOL080-06	GQ283584	GQ283898
Trichophaga tapetzella (Linnaeus, 1758)	Tineinae		KF492155/LTOLB001-08	JQ784867	JQ787066
Acrolophus panamaeBusck, 1914	Acrolophinae		KF492203/NAMUM310-08	JQ784883	JQ787078
Tischeria ekebladella Bjerkander, 1795	Tischeriidae		KX040284/ODOPE013-11	JQ784854	JQ787057
Azaleodes micronipha Turner, 1923	Palaephatidae		KX232894/LTOLB045-08	JQ784343	JQ786695
