# Supplementary material for: First report of the genus Pelecystola Meyrick (Lepidoptera, Tineidae) in China, with description of a new species
Source: Zookeys. 2021 Jun 22;1046:189–206. doi: 10.3897/zookeys.1046.68329 (PMC8241806; doi:10.3897/zookeys.1046.68329)
Supplement: Supplementary material 3 — Table S3. List of forward (F) and reserve (R) primers with annealing temperature used in PCR amplification [file zookeys-1046-189-s003.xls]

## Sheet: Sheet1
Title: First report of the genus Pelecystola Meyrick (Lepidoptera, Tineidae) in China, with description of a new species Authors: Lin-Lin Yang, Hou-Hun Li
Table S3. List of forward (F) and reserve (R) primers with annealing temperature used in PCR amplification.
Gene region	Direction	Primer name	Primer	Annealing temperature	Product length (bp)	Reference
COI	Forward	LCO1490	5' GGT CAA CAA ATC ATA AAG ATA TTG G 3'	50	658	(Folmer et al. 1994)
COI	Reverse	HCO2198	5' TAA ACT TCA GGG TGA CCA AAA AAT CA 3'
COI	Reverse	Chelicerate-R1	5' CCT CCT CCT GAA GGG TCA AAA AAT GA 3'	53	604	(Barrett and Hebert 2005)
COI	Forward	LepF	5' ATT CAA CCA ATC ATA AAG ATA TTG G 3'	53	658	(Simon et al. 1994)
COI	Reverse	LepR	5' TAA ACT TCT GGA TGT CCA AAA AAT CA 3'
wingless	Forward	LepWg1	5' GAR TGY AAR TGY CAY GGY ATG TCT GG 3'	56	402	(Brower and DeSalle 1998)
wingless	Reverse	LepWg2	5' ACT ICG CAR CAC CAR TGG AAT GTR CA 3'
CAD	Forward	CAD743nF	5' GGN GTN ACN ACN GCN TGY TTY GAR CC 3'	52	517	(Wahlberg et al. 2008)
CAD	Reverse	CADmidR	5' CAT TCW GCK GCW ACT GTA TC 3'
CAD	Forward	CADmidF	5' KGG ATT YTC NGA YAA ACA AAT NGC 3'	50	412	(Wahlberg et al. 2008)
CAD	Reverse	CAD1028R	5' TTR TTN GGN ARY TGN CCN CCC AT 3'
